# Supplementary material
Source: MDPI journal article supplement (https://www.mdpi.com/2311-7524/10/3/219)
Supplement: s1 [file s1]

**Figure S1.** (a) OPLS-DA score and (b) loading plots of B16 cells stimulated with  $5 \times 10^{-5}$   $\mu\text{g/mL}$   $\alpha$ -MSH and 0.2 mg/mL *Dendropanax moribifera* Leveille extract ( $\alpha$ -MSH-DLE-0.2) or control.

**Table S1.** Identified metabolites extracted from B16-F10 cells**amino acid (19)**

|                  |                   |                       |
|------------------|-------------------|-----------------------|
| L-isoleucine     | glycolic acid     | L-homoserine          |
| L-Valine         | L-proline         | glycine               |
| L-Aspartic acid  | L-tyrosine        | N-acetylserine        |
| L-threonine      | pyroglutamic acid | N-acetylglutamic acid |
| L-serine         | L-methionine      | L-alanine             |
| 4-hydroxyproline | L-glutamic acid   | L-phenylalanine       |
| β-alanine        |                   |                       |

**organic acid (17)**

|                          |               |                       |
|--------------------------|---------------|-----------------------|
| fumaric acid             | quinic acid   | benzoic acid          |
| threonic acid            | pyrophosphate | 4-aminobutyric acid   |
| lactic acid              | succinic acid | hydroxypropionic acid |
| malic acid               | butyric acid  | ureidoisobutyric acid |
| citric acid              | oxalic acid   | phthalic acid         |
| uridine 5'-monophosphate | malonic acid  |                       |

**fatty acid and esters (13)**

|                   |                    |                            |
|-------------------|--------------------|----------------------------|
| palmitoleic acid  | pentadecanoic acid | capric acid                |
| palmitic acid     | heptadecanoic acid | arachidonic acid           |
| octadecenoic acid | tetradecanoic acid | MG(16:0/0:0/0:0)           |
| stearic acid      | nonanoic acid      | 1-monooctadecanoylglycerol |
| octanoic acid     |                    |                            |

**sugar and alcohol(14)**

|                  |                |                     |
|------------------|----------------|---------------------|
| ethylene glycol  | melezitose     | ribitol             |
| creatinine       | D-glucitol     | erythritol          |
| myo-inositol     | D-fructose     | 1,4-anhydroglucitol |
| glycerol         | D-ribofuranose |                     |
| mannitol         |                |                     |
| cholesterol      |                |                     |
| propylene glycol |                |                     |

**phosphates (4)**

|                        |                        |                     |
|------------------------|------------------------|---------------------|
| L-glycerol-3-phosphate | 3-phosphoglyceric acid | monomethylphosphate |
| phosphoric acid        |                        |                     |

**amines (6)**

|              |               |          |
|--------------|---------------|----------|
| ethanolamine | hydroxylamine | dopamine |
|--------------|---------------|----------|

niacinamide

putrescine

propanamide

**others (6)**

tetradecane

n-pentadecane

heneicosane

octadecane

urea

2-oxazolidinone

---
